# Supplementary material
Source: MDPI journal article supplement (https://www.mdpi.com/search?q=viruses-11-00687)
Supplement: s001 [file viruses-11-00687-s001.pdf]

**Supplementary Table 1: Propensity score adjusted Cox regression analysis to predict HBsAg loss following treatment-induced HBeAg seroconversion in the entire patient cohort.** HR: Hazard Ratio. C.I.: Confidence Interval. Treatment cessation was investigated as a time-dependent covariate. Propensity scores were defined as the predicted probabilities calculated using a logistic regression model that assessed the correlation of both cirrhosis status and NA type with (1) Caucasian ethnicity; and (2) treatment cessation.

| Not adjusted for propensity score                                                   |                |                   | Adjusted for propensity score                                        |                |                   |
|-------------------------------------------------------------------------------------|----------------|-------------------|----------------------------------------------------------------------|----------------|-------------------|
|                                                                                     | <i>p</i> value | HR (95% C.I.)     |                                                                      | <i>p</i> value | HR (95% C.I.)     |
| Caucasian ethnicity (yes/no)                                                        | 0.001          | 6.70 (2.26-21.40) | Caucasian ethnicity (yes/no)                                         | 0.001          | 6.95 (2.25-21.53) |
|                                                                                     |                |                   | Propensity score (1)                                                 | 0.794          | 0.70 (0.05-10.69) |
| Treatment cessation (yes/no; time-dependent)                                        | 0.372          | 1.45 (0.64-3.29)  | Treatment cessation (yes/no)                                         | 0.211          | 1.76 (0.72-4.29)  |
|                                                                                     |                |                   | Propensity score (2)                                                 | 0.375          | 0.42 (0.07-2.81)  |
| Treatment cessation after at least 6 months consolidation (yes/no; time-dependent)  | 0.289          | 1.73(0.63-4.79)   | Treatment cessation after at least 6 months consolidation treatment  | 0.185          | 2.08 (0.70-6.13)  |
|                                                                                     |                |                   | Propensity score (2)                                                 | 0.361          | 0.42 (0.06-2.74)  |
| Treatment cessation after at least 12 months consolidation (yes/no; time dependent) | 0.525          | 1.52 (0.42-5.47)  | Treatment cessation after at least 12 months consolidation treatment | 0.387          | 1.82 (0.47-7.11)  |
|                                                                                     |                |                   | Propensity score (2)                                                 | 0.374          | 0.42 (0.06-2.81)  |
